# Supplementary material for: Long-range dependence in coastal framework geology: Asymmetries and implications for barrier island resiliency
Source: Copernicus journal article supplement (doi:10.5194/esurf-2018-41), 2018-06-15
Supplement: Supplementary file [file esurf-2018-41-AC1-supplement.pdf]

The authors would like to thank reviewers for comments which helped improve the manuscript significantly. Each reviewer comment is addressed in detail below, and the revised manuscript with track changes has been attached to the end of this document.

### **Response to RC1**

One of the key outcomes of this work should be to highlight the need for such data in order to improve coastal management decisions.

The authors believe that this is better articulated in the revised manuscript after addressing all of the following reviewer comments.

The authors need to be explicit early in the paper about how this work departs from or adds to their previously published findings. In the current manuscript this only happens at line 255. This may also require appropriate changes to the title. Several messages are contained in the paper, some of which overlap to a greater or lesser extent with the authors' previously published work. Consequently, a deliberate focus on the key departure of this paper is essential.

The title, abstract, introduction, and discussion have been updated to distinguish this paper from previous papers.

L6 “asymmetrically”: Is this really what you mean? Isn't simply "irregular" a better term?

The text has been updated to clarify that the authors are referencing an ‘irregular’ framework geology with paleo-channels:

*This paper builds on previous research by demonstrating that paleo-channels in the irregular framework geology can have a directional influence on alongshore beach and dune morphology.*

L9 “long-range dependence (LRD) parameter”: Dependence of what on what?

A more complete description of the meaning of LRD is not feasible in the abstract, given length requirements. However, the Methods section does contain this information.

L10 “(ARFIMA) models”: What do they model?

The text has been updated to clarify that ARFIMA models were originally developed for stock market economic forecasting:

*The influence of relict paleo-channels on beach and dune morphology on Padre Island National Seashore, Texas was quantified by isolating the long-range dependence (LRD) parameter in autoregressive fractionally-integrated moving*

*average (ARFIMA) models, originally developed for stock market economic forecasting.*

L10 “all scales”: Temporal and spatial?

The text has been updated to clarify that “~250 unique spatial scales” were used in the analysis, in combination with the moving window approach.

L16 “PAIS”: If PAIS means "Padre Island National Seashore", it is a strange acronym.

PAIS is the official acronym for Padre Island National Seashore used by the U.S. National Park Service.

L19 “asymmetric”: OK, so asymmetric means having a longshore gradient away from point sources. Is this correct?

This is correct. Text was updated to further clarify this potential point of confusion:

*The spatial patterns in LRD surface morphometrics and framework geology variations demonstrate that the influence of paleo-channels can be asymmetric (i.e. affecting beach-dune morphology preferentially in one direction alongshore) where the alongshore sediment transport gradient was unidirectional during island development.*

L23 “how the framework geology”: In most cases it is first necessary to assess the framework geology.

Text was revised to include assessing the framework geology as a first essential step:

*Coastal management projects should first seek to assess the framework geology and understand how influences coastal processes in order to more effectively balance long-term natural variability with short-term societal pressure.*

L54: See also the review by Cooper et al. 2018. Global and Planetary Change.

The reference was added to support the importance of understanding how framework geology affects coastal geomorphology.

L65 “headlands along Fire Island, NY reflected in”: (missing) “are”

The text has been updated to reflect this suggestion.

L75 “Lazarus et al. (2011) argued that”: Give page number.

The page number was added to the in-text citation.

L80 “beach and dune morphology and the dissipative”: (missing) “therefore”

This sentence has been split into two based on this and RC2’s suggestions:

*This implies that variations in the framework geology, such as paleo-channels, do not influence long-term shoreline change, but, as noted, shoreline change is influenced by the alongshore variation in beach and dune morphology. The dissipative behavior of shoreline change does not negate the importance of framework geology.*

L100 “gradient during the time”: (word choice) “that”

The text has been updated to reflect this suggestion.

L105-107: This sentence seems out of place and could be deleted. The several intermediate steps between identifying framework controls and coastal management would need to be described to render it a useful statement.

This sentence has been removed.

L126 “drown”: (word choice) “drowned”

The text has been updated to reflect this suggestion.

L126 “relict dunes”: Aeolian?

Presumably these were aeolian, but I am unable to locate any literature that definitively confirms that they were originally aeolian landforms.

L126 “approximately 80 km inland”: Of the LGM shoreline?

Approximately 80 km inland of the LGM shoreline is correct. The text has been updated to reflect this clarification.

L134-135: The paleo landsurface and ravinement surface need not coincide. They are not synonymous.

We acknowledge that this is not always the case; however, in the case of PAIS, the ravinement surface is the best approximation we have of how the paleo-landscape may have looked. Depth to the MIS II surface (as mapped by Anderson et al., 2016) and depth to the ‘Pleistocene ravinement surface’ (from Fisk, 1959) roughly correspond along the island, further supporting our interpretation of the ravinement surface as representing the paleo-surface during MIS II.

L144 “complexities in the framework geology”: More than that, the very fact that the framework geology has been measured, makes it an ideal location.

The text has been updated to add that simply having an existing map of the framework geology is a substantial benefit to using PAIS for this study:

*Complexities in the framework geology and modern island geomorphology, coupled with the fact that PAIS framework geology has already been mapped, make PAIS an ideal location to examine how framework geology influences barrier island geomorphology.*

L157-160: Just how much does it expand on these authors' previous work?

The text has been updated to clearly describe how the current work expands on previous work by examining spatial lag distances in how paleo-channels affect beach-dune morphology:

*The current paper expands on previous research by adapting economic forecast models to determine how paleo-channels in the framework geology have influenced beach and dune evolution and whether this influence is directional and scale-dependent. Identifying these spatial lags, their spatial scale(s), and their lag direction(s) is the first step toward integrating this information into morphodynamic prediction models.*

L169-171: How does this square with line 310 et seq.?

The text has been updated to include shoreline change as a variable used in this paper:

*Long-term shoreline change (1950-2007) was used in this analysis because fine-scale and shorter-term changes are unlikely to persist given that there has not been ample storm activity to continually force shorter-term variations in shoreline change at PAIS (Houser et al., 2018).*

L195 “SRD and LRD”: The title only refers to LRD. Also, please define short vs long.

A sentence has been added in section 2.3 to define SRD and LRD and the difference between them:

*Short-range dependence includes localized relationships in the data series, such as autoregressive or moving average, there LRD is the dependence of values on all other data values within the data series, irrespective of trend or window size.*

L230 “may become obfuscated with increasingly large and/or complex data series”: How does one know whether this has happened? Is there an optimum data density?

While it would be possible to isolate the autoregressive parameter,  $p$ , in a series of ARFIMA models where the data series length is gradually increasing, this analysis is beyond the scope of this paper. The current paper is focused on understanding broad-scale patterns in geomorphology through variations in the LRD (*i.e.* ‘self-similarity’) parameter,  $d$ .

L256-260: OK, this statement eases my concern about the overlap with the authors' previous work. To that extent, this point needs to be made much earlier and much more clearly in the paper.

The text has been updated to clarify the difference between this paper and previous publications:

*While wavelet decomposition can provide insight into relationships between two variables in the same location (Wernette et al., 2018), utilizing ARFIMA as a sliding window across multiple spatial scales can shed light on relationships that exhibit a lag in one or both directions. The advantage of this new approach is its application to examine alongshore influences of various natural and anthropogenic features (e.g. jetties, seawalls, groin fields, paleo-channels, and/or headlands) and identify their effective zone(s) of influence on coastal processes and geomorphology.*

L314 “consistent with Lazarus et al. (2011)”: (missing) “the findings of”

The text has been updated to reflect this suggestion.

L371 “short dunes”: What is a short dune? = low dune?

Variations on ‘tall’ and ‘short’ have been replaced by ‘high’ and ‘low,’ respectively. This change is throughout the manuscript.

L378 “mechanism that barrier islands”: (word choice) “by which”

The text has been updated to reflect this suggestion.

L382 “broad scales but breaks down”: (missing) “this”

The text has been updated to reflect this suggestion.

L408 “tall dunes”: High and low are preferable in this context to short and tall.

Variations on ‘tall’ and ‘short’ have been replaced by ‘high’ and ‘low,’ respectively. This change is throughout the manuscript.

L409 “instead be partially”: (word choice) “sediment is likely to be”

The text has been updated to reflect this suggestion.

L413 “areas with shorter”: (word choice) “low”

Variations on ‘tall’ and ‘short’ have been replaced by ‘high’ and ‘low,’ respectively. This change is throughout the manuscript.

L480 “build large dunes on the updrift side”: River valleys don't build dunes. What processes are actually happening?

The text has been updated to improve clarity:

*The closest modern analogy to this alongshore sedimentation process is the formation and evolution of an alongshore spit forming a baymouth bar, where river valleys can become cut off by the elongating spit while large dunes can develop on the updrift side.*

L485 “taller”: (word choice) “high”

Variations on ‘tall’ and ‘short’ have been replaced by ‘high’ and ‘low,’ respectively. This change is throughout the manuscript.

L491-493: Meaning unclear.

The text has been revised to improve clarity:

*Long-term shoreline change rate is the cumulative result of waves moving sediment on a daily basis, while short-term variations in shoreline position caused by storms are feasible.*

L494 “variations in PAIS shoreline position”: (missing) “identified here”

The text has been updated to reflect this suggestion.

L504 “likely to recover”: (missing) “respond to and”

The text has been updated to reflect this suggestion.

L509 “it follows that spatial”: (missing) “understanding”

The text has been updated to reflect this suggestion.

L515-517: What is the practical implication for current practice (e.g. Bruun and derivatives)?

The text was added to expand on the implications, as per this suggestion:

*Predicting coastal change without accounting for all factors affecting formation and evolution, such as directional dependencies due to framework geology, are more prone to uncertainty, which can have important managerial applications.*

L519-520: The potential is certainly there in areas where such data exist and where its implications are understood. Nourishment is just one of several management tools that stand to be assisted by such understanding.

The text has been revised to be more broad in its application to coastal “engineering and management” projects:

*Given that framework geology influences beach and dune morphology along the coast, the methods and results of this paper represent an opportunity for managers to improve coastal engineering and management projects, such as beach nourishment.*

L527-530: Somewhat gratuitous and not necessary.

This sentence has been removed.

## **Response to RC2**

In the discussion, the authors go on to state that their study area hasn’t been significantly impacted by a storm since 1999. Some discussion of the extent to which this assumption and ultimately their results would hold if a storm did impact the island and how their conceptual model might apply outside of the Gulf of Mexico would help to frame the scope of the audience for this contribution.

Some brief discussion has been added to describe how the results would be affected by hurricane impacts:

*If hurricanes had impacted PAIS more frequently, it is likely that the alongshore variations in dune morphology, which were initially set up by the paleo-channels, would have been reinforced. This is because areas set up as low dunes would be preferentially overwashed while areas of high dunes would be more resistant and resilient during and following a storm. Therefore, the impact of a hurricane would highlight alongshore variations in dune morphology set up by the paleo-channels.*

P1, L14: What does this mean? Is there another way to describe this relationship? Since this is the primary distinction from previous work and it is used several times in the abstract, the meaning should be immediately clear and/or defined at first use.

The text has been revised to improve clarity:

*This paper builds on previous research by demonstrating that paleo-channels in the framework geology can have a directional influence on alongshore beach and dune morphology.*

P1, L19: Without reading the paper, the reader may not have the context for what this means. Use another word to describe what you mean...”peaks?”

While ‘peaks’ and ‘flares’ capture similar patterns, the authors believe that ‘flares’ is a better fit because ‘peaks’ tends to

P1, L20 and L23: Why not just “paleo-channels” here? The current phrasing is redundant.

The text has been revised to reduce redundancy:

*Many ‘flares’ in the LRD plots correlate to relict infilled paleo-channels, indicating that the framework geology has a significant influence on the morphology of PAIS. Barrier island surface morphology LRD is strongest at large paleo-channels and decreases to the north. The spatial patterns in LRD surface morphometrics and framework geology variations demonstrate that the influence of paleo-channels can be asymmetric where the alongshore sediment transport gradient was unidirectional during island development.*

P2, L3 and L5: Rewrite these two sentences to eliminate redundancy.

Line 5 has been revised to reduce redundancy:

*Barrier island geomorphology can exhibit considerable variability alongshore, leading to varying responses to storm activity that ultimately determines the response of the island to sea level rise. Understanding the source of variability in beach and dune morphology can provide insight into how the barrier island is likely to change in response to future storms and sea level rise.*

P2, L7: What is meant by “patterns of vulnerability?”

The text has been revised to improve clarity:

*Storm waves interact with the variable morphology of the nearshore, beach, and dunes to determine how vulnerability varies along a barrier island.*

P2, L10-11: I think you mean “where VARIABILITY IN geologic structure can RESULT FROM variations in..., yes?”

The text has been updated based on this reviewer comment:



*In this paper, the term “framework geology” is defined as any subsurface variation in geologic structure, where variability in geologic structure can result from variations in sediment type (i.e. sand vs. silt), differences in compaction, or significant changes in the subsurface organic content or mineralogy.*

P2, L19-20: There are many other models that assume alongshore uniformity beyond the probabilistic ones listed here. Consider citing a few of those as well. Also, Long et al., 2014 is not a modeling paper... did you mean to cite something else?

Additional citations have been added, and Long et al., 2014 has been removed.

P2, L28-30: Citation?

The text has been updated to include a citation for this statement:

*The nearshore bathymetry impacts sediment transport gradients along the island, which has implications for beach and dune response and recovery following a storm (Brenner et al., 2018).*

P2, L30-33: Try to summarize the contributions from Houser, 2012 more succinctly (e.g., in one sentence) so as not to lose the focus of the paragraph.

Text was condensed based on the reviewer comment:

*Houser (2012) demonstrated that variations in shoreline change patterns, beach width, and dune height corresponded to ridges and swales at Pensacola, FL. Shoreline position was more stable along the ridges, resulting in a wider beach which provided more sediment for onshore winds to create taller and more persistent dunes (Houser, 2012).*

P3, L3-5: I do not understand this sentence. Reword.

This sentence has been split to improve clarity based on the reviewer comment:

*This implies that variations in the framework geology, such as paleo-channels, do not influence long-term shoreline change, but, as noted, shoreline change is influenced by the alongshore variation in beach and dune morphology. The dissipative behavior of shoreline change does not negate the importance of framework geology.*

P3, L6-9: Why is vegetation being brought up here? How does this sentence help you set up the scientific problem you're testing?

The text has been updated to clarify that, while vegetation distribution does affect dune morphology, framework geology is the dominant driver of broad-scale dune morphology:

*While alongshore variation in dune morphology is also influenced by the distribution of vegetation in both space and time (Lazarus et al., 2011; Lazarus, 2016; Goldstein et al., 2017), the self-organized behavior of the dune morphology is ultimately set up by the framework geology (see Houser, 2012; Weymer et al., 2015b; Stallins and Parker, 2003).*

P3, L11-13: Regarding the stated purpose of this paper, how is this different than the purpose of your 2018 paper in Marine Geology, which states: “The purpose of this paper is to examine the influence of framework geology on beach and dune geomorphology at Padre Island National Seashore (PAIS), Texas, USA, where the framework geology is variable alongshore.”? Use the introduction of this paper to make those distinctions explicit.

The text has been updated to clarify that this paper is specifically focusing on the potential for asymmetries in beach-dune morphology that stem from paleo-channels in the framework geology:

*The purpose of this paper is to test the hypothesis that relict infilled paleo-channels in the framework geology of a barrier island play a significant role and have an asymmetric influence on the alongshore variation in beach and dune morphology at a range of alongshore length scales.*

P5, L3-5: First mention of economic forecast models! Ok, so what is the purpose of this paper? It sounds like it is to determine how paleo-channels have influenced beach and dune evolution. But this isn't a process-based study, so how are you going to determine “the how?” It seems more likely that what you are trying to do is to adapt an economic forecast model to explore the spatial relationships (Are they lagged spatially? Is there a scale-dependence?) between beach and dune morphology and the presence/absence of subsurface paleochannels.

The paper utilizes economic forecast models to explore the spatial relationships and (potential) lag between multiple variables in order to better understand how features such as paleo-channels have influenced coastal geomorphology.

The text has been updated to clarify that identification of these spatial lags is the first step toward integrating them into future research models:

*Identifying these spatial lags, their spatial scale(s), and their lag direction(s) is the first step toward integrating this information into morphodynamic prediction models.*

P5, L27-28: Here the distinction between the 2018 paper and this paper is clearly stated. But I would argue that Wernette et al., 2018 did more than “confirm the location of several paleo-channels.” (That's actually what some of your co-authors papers, Fisk, and Anderson et al. did, no?) It also established a spatial connection between the presence of those paleochannels and beach and dune morphology by applying several signal analysis techniques in space. Be careful to distinguish this work from previous work, particularly Wernette et al., 2018.

The text has been updated slightly to make this distinction clearer:

*Previous research used EMI surveys to confirm the location of several paleo-channels and begin to quantify their influence on coastal geomorphology EMI surveys (Wernette et al., 2018; Weymer, 2016), while the current paper aims to determine the alongshore influence (direction and scale) of the paleo-channels.*

P7, L13-15: “Identifying the influence of very broad-scale influencing factors”? Rewrite this sentence to clarify what you mean. It’s probably a good idea to change “framework geology” to “subsurface paleo-channels” or “paleo-channels” to help maintain the focus of THIS paper.

The text has been updated to specifically call out paleo-channels in the framework geology as a focus of the paper:

*In the case of coastal geomorphology,  $d$  parameter values may be particularly useful for identifying the influence of very broad-scale influencing factors, such as paleo-channels in the framework geology*

P7, L18-24: The distinction between this paper and previous work is clear in this section. Nicely stated. Should the focus of the paper be on the application of this technique to coastal geomorphology, specifically the relationship between paleo-channels and beach/dune morphology? The relationships identified in previous work could be used as justification for this “experiment.” In fact, some evaluation of this technique over (or in place) of others previously used would be appropriate somewhere in the paper. In other words, could you just start with this analysis rather than those done in Wernette et al., 2018 or are those a prerequisite for ARFIMA modeling?

The text has been updated to clarify that the new approach presented can be used to identify the alongshore zone of influence:

*While wavelet decomposition can provide insight into relationships between two variables in the same location (Wernette et al. 2018), utilizing ARFIMA as a sliding window across multiple spatial scales can shed light on relationships that exhibit a lag in one or both directions. The advantage of this new approach is its application to examine alongshore influences of various natural and anthropogenic features (e.g. jetties, seawalls, groin fields, paleo-channels, and/or headlands) and identify their effective zone(s) of influence on coastal processes and geomorphology.*

The methodologies employed by the current paper and Wernette et al., 2018 are entirely independent and neither one relies on the other.

P7, L29-31: Complete this discussion with an explanation of how you arrived at the decision to use 250 unique computational windows; why not 200 or 300? How much do you have to increase or decrease the number of windows before you experience large increases in computing power or lose the ability to resolve the breakdown in spatial structure, respectively?

The challenge with describing computational performance is that it will vary significantly by machine. Describing, in detail, the specifics of the computational performance is not directly relevant to the purpose of the manuscript.

Evaluating each data series at 250 distinct spatial scales was selected because the available desktop computers were not able to handle 300 unique spatial scales. The authors aimed to maximize the number of unique alongshore spatial scales, which was approximately 250 scales.

The text has been slightly updated to highlight the intense computational requirements of analyzing a single data series:

*While the number of computational windows can be decreased, or increased, it is important to note that the ARFIMA modelling process is computationally intensive, requiring days to complete analysis of a single spatial data series on a high-performance desktop computer.*

P8, L33: Shouldn't the results section start with a description of plot 4a? Also, what is meant by "greatest LRD values?" Consider adding "as indicated by the dominance of red on the plot" or similar to keep the reader with you and reinforce the information from the previous section. Why doesn't apparent conductivity (Fig. 4a) show "the greatest LRD values?"

Based on another comment below the results have been restructured to discuss figure 4a and continue alphabetically. Text has also been updated to clarify what the authors mean by

*The shoreline change LRD plot exhibits the greatest LRD values (i.e. highest LRD values across all broad spatial scales) along the length of PAIS, as indicated by the dominance of red hues in figure 4b.*

P8, L34-P9, L3: Here and throughout the results section, it might be better to state your observations from the plots followed by your "interpretation" of the physical meaning. Here you might say, "Peaks in the shoreline change LRD plot are very narrow, which we interpret to mean that long-term shoreline change is dominantly dissipative...". Use the discussion to reference papers that support your interpretations or point out where they are not consistent with existing literature.

The text has been revised here and elsewhere throughout the Results, based on the suggestion provided:

*Peaks in the shoreline change LRD plot are very narrow, which we interpret to mean that the long-term shoreline change is dominantly dissipative with only minor undulations due to localized coastal processes, consistent with Lazarus et al. (2011) who demonstrated that broad-scale and long-term shoreline change is dissipative.*

P9, L11: Indicate on Fig. 4 where the island is divided into thirds (southern, central, and northern) so the reader can easily follow the text and identify the features to which you refer.

This is an approximation and has no clear division. As such, the authors have revised the text to clarify that this is a fuzzy boundary:

*Beach width LRD is more variable than shoreline change (Fig. 4c), with the least amount of variability concentrated in approximately the southern third of the island. These flares are likely present because...*

P9, L23-24: This is speculation. Move this to discussion where you can discuss your reasoning for this and support it with evidence from the literature.

This sentence has been removed from the Results. The Discussion already has a similar statement with supporting evidence.

P9, L33: How are dune crest elevation and dune height distinct from one another? Is there an advantage to using both rather than just one of these metrics?

Dune crest elevation is simply the elevation of the crestline, whereas dune height is the difference in elevation between the dune crest and dune toe. Dune crest elevation is a greater determining factor of whether a dune will be overwashed or inundated, whereas dune height is a better proxy for how developed a dune is. The advantage of using both is examining how developed the dune system is (through dune height) and its ability to resist overwash (dune crest elevation).

P10, L16 & P10, L23-24: Follow the first sentence of this paragraph with your interpretation of what it means (the last sentence of the paragraph) and then go in to the details of the broad- and fine-scale patterns that drives your interpretation. This structure could be applied to the entire results section, particularly the next paragraph (P10, L26-34).

The first sentence has been restructured to improve clarity as suggested by this comment:

*Island width exhibits the greatest alongshore variability in LRD of all island and framework geology morphometrics (Fig. 4g) and demonstrates that island width is dependent on broad- and fine-scale patterns of change.*

P11, L1-9: Either move this paragraph to the beginning of the results section to be consistent with the figure or change the figure to be consistent with the text. Also, the logic in this paragraph is a bit jumbled. Rewrite to follow the structure of observation/interpretation/reasoning.

The paragraph has been moved closer to the beginning of the Results section and slightly restructured to follow the suggested structure:

*Subsurface apparent conductivity exhibits substantial LRD along the entire length of PAIS (Fig. 4a). Patterns in the subsurface framework geology LRD plot demonstrate that the framework geology is self-similar at broader scales, and that this structure varies alongshore at finer alongshore length scales which correspond to the scale of the previously identified paleo-channels. The large LRD values at broad spatial scales (Fig. 4a) demonstrate that the paleo-topographic structure dominated by broad-scale coastal curvature over very broad spatial scales. Since the framework geology reflects the paleo-topography and the modern barrier island surface is dissipative at very broad scales, based on large LRD values at broad scales in the modern barrier island morphology, it follows that the framework geology is dissipative. The substantial LRD along much of the island supports previous work by Weymer (2016) and Weymer et al. (in press), which demonstrated that subsurface framework geology exhibits LRD at discrete locations and alongshore length scales.*

P11, L4-7 (highlighted in green): Are there patterns in Fig. 4a? If so, they are not apparent in the figure. Or is it the lack of any patterns (e.g., red everywhere) that you're referring to? Also, the part of the sentence that states "this structure varies very little alongshore and with scale" seems to contradict your statements elsewhere in this paper and in Wernette et al., 2018 that framework geology varies alongshore. Clarify. Finally, what do you mean by "the paleo-topographic structure trends toward a homogenous surface at broad scales?" So, if you shrunk the alongshore length scale the trend would be different?

The text has been updated to improve clarity:

*Patterns in the subsurface framework geology LRD plot demonstrate that the framework geology is self-similar at broader scales, and that this structure varies alongshore at finer alongshore length scales which correspond to the scale of the previously identified paleo-channels.*

The text has also been updated to clarify that the "homogeneous surface" is actually in reference to the broad-scale coastal curvature:

*The large LRD values at broad spatial scales (Fig. 4a) demonstrate that the paleo-topographic structure dominated by broad-scale coastal curvature over very broad spatial scales.*

P11, L12-25: This paragraph seems an odd fit here. It seems as if it's defending the choice of barrier island metrics used in the paper, which, if necessary at all, might be better suited for section 2.2. If that's not the point of this paragraph, it should be revised for clarity.

This paragraph has been moved to section 2.2, as the authors agree it is more focused on describing the importance of the selected metrics.

P11, L30-31: The point about the depth of the paleo-channels is worth making earlier in the paper. If I understand what you're proposing correctly, the relationship that you're trying to tease out is the relationship between paleo-channels and barrier island morphology as the paleo-channels were infiling and (perhaps?) as the barrier island was forming. And that you are using the assumption that those dune heights/elevations initially established are what's driving the modern morphology now (see P11, L6-25), based on Houser, 2012; Weymer et al., 2015b; and Lazarus, 2016. This is quite the hypothesis, particularly since it would also assume that the barrier island had the same configuration as it does today (which is likely not the case). How can you better convince the reader that your hypothesis is supported by your analysis?

Text has been added to clarify that the authors are referring to the idea that larger paleo-channels (width and depth) affect beach-dune morphology along greater stretches of coastline than smaller paleo-channels. Furthermore, the zone of alongshore influence is because channel dimensions will dictate the accommodation space present and a paleo-channel's ability to serve as a sediment sink.

*In this way, larger paleo-channels (depth and width) will have a greater accommodation space and influence beach-dune morphology along a greater stretch of coast, while smaller paleo-channels have a more limited accommodation space and, therefore, influence a smaller stretch of adjacent coastal morphology.*

P12, L10-11: The use of "asymmetrically" here is confusing. I think what you mean is that paleo-channels and alongshore currents interact to drive asymmetries in their spatial relationship(s) to barrier island morphology, yes?

The text has been updated to clarify this confusion:

*This paper presents new information supporting the hypothesis that paleo-channels in the framework geology interact with alongshore currents to drive asymmetries in barrier island geomorphology and that the scale of influence is ultimately limited.*

P12, L18-24: The end of this paragraph is jumbled. Rewrite for clarity. It seems that ultimately this is a discussion of sediment supply as the channel was infiling and the island/beach/dunes were forming. I think what you're trying to get at is that oblique channels would have taken more sediment to fill relative to shore-normal paleo-channels, thereby leaving less sediment available for building beaches and dunes?

The text has been revised to improve clarity:

*An oblique channel would have required more sediment and take longer to fill than a shore-normal channel. Subsequently, a wide beach and dunes would begin to form in the shore-normal paleo-channel before the oblique paleo-channel. For an oblique paleo-channel the volume of sediment required to fill the channel from*

*alongshore sediment transport and fluvial deposition from the mainland would likely have been insufficient to build a wide beach to supply sediment for significant dune growth.*

P12, L26- P13, L12: This section would benefit from a schematic of the processes you describe. Where is sea level when these processes are ongoing? Is this consistent with published theories of coastal evolution for the area (a la Weise and White, 1980)?

Information about sea-level has been added to this description. A schematic of the system formation and evolution has been added as figure 7.

P13, L3-5: Citation for the baymouth-bar analogy?

This sentence has been revised to exclude reference to baymouth bars:

*The closest modern analogy to this alongshore sedimentation process is the formation and evolution of an alongshore spit eventually completely crossing the outflowing river channel, where the river is eventually cut off by the elongating spit. In this case, sediment is supplied to the updrift beach and provides a sediment source for dunes to form.*

Figure 2. Reference to “oblique gravel ridges” in caption of panel c is incorrect. Gravel was present in the troughs between sandy shore-oblique bars. Suggest a citation for Browder and McNinch, 2006 here instead.

The figure caption has been updated to “oblique sandbars,” as the features are originally referred to by McNinch (2004).

Figure 3. This figure appeared to be ~1.5 inches high by 2 inches wide in the submitted manuscript. Consider making this figure much larger so the reader can follow your interpretation of the results, particularly with regard to asymmetry. For example, is your interpretation of asymmetry due to what appears to be a “tail” that trails off to the left at the top of the peak at “B” or due to the concentration of darker blue toward the left of the bottom of the right peak under “B?”

This is the correct interpretation, as also described in the text. The figure has been increased in size for legibility purposes.

Figure 4. It’s very difficult to see the labels on the x and y axes in all of these plots. It could be separated into two figures, one with AC, Shoreline Change, 2km Bathy, and 4km Bathy and a second with all of the island metrics (BW, DTE, DCE, DH, and IW).

The authors would prefer to keep the figures as one because it facilitates comparison of one LRD plot against another LRD plot at a given location alongshore. Splitting the figure into 2 separate figures would make this comparison substantially more difficult.



Figure 5. I don't understand the justification for the coloration of the northern half of these panels with the SRD polygon. What are you looking at to justify the northward scale decrease? In panel B, there's a peak about an inch in from the left that's taller than the peaks south of it which would seem to contradict the interpretation as I understand it.

The colors are used to highlight a general trend in the transition from LRD to SRD (as marked by the blue-red boundary). The gradual ramp up from north to south is based on a generalization of the flares present in the LRD plots. Although there are other peaks in the data, they are highly localized and, when generalizing the plots, they do not fit into any larger patterns. This is similar to filtering the data for low-frequency patterns.

**Directional dependency and Long-range dependence in coastal framework geology:  
Asymmetries and Implications for barrier island resilience**

Phillipe A. Wernette<sup>1,2,\*</sup>, Chris Houser<sup>1</sup>, Bradley A. Weymer<sup>3</sup>, Mark E. Everett<sup>4</sup>, Michael P. Bishop<sup>2</sup>, and Bobby Reece<sup>4</sup>

<sup>1</sup>University of Windsor, Department of Earth and Environmental Sciences, Windsor, Ontario, Canada N9B 3P4

<sup>2</sup>Texas A&M University, Department of Geography, College Station, Texas, USA 77843

<sup>3</sup>GEOMAR Helmholtz Centre for Ocean Research Kiel, 24148 Kiel, Germany

<sup>4</sup>Texas A&M University, Department of Geology and Geophysics, College Station, Texas, USA 77843

*Correspondence to:* Phil Wernette (wernette@uwindsor.ca) \*now at University of Windsor, Department of Earth and Environmental Sciences, 401 Sunset Ave., Windsor, Ontario, Canada N9B 3P4

## Abstract.

Barrier island transgression is influenced by the alongshore variation in beach and dune morphology, which determines the amount of sediment moved landward through washover. While several studies have demonstrated how variations in dune morphology affect island response to storms, the reasons for that variation and the implications for island management remain unclear.

This paper builds on previous research by demonstrating that paleo-channels in the irregular framework geology can have a directional influence on alongshore beach and dune morphology asymmetrically alongshore. The influence of relict paleo-channels on beach and dune morphology on Padre Island National Seashore, Texas was quantified by isolating the long-range dependence

(LRD) parameter in autoregressive fractionally-integrated moving average (ARFIMA) models, originally developed for stock market economic forecasting. ARFIMA models were fit across all scales ~250 unique spatial scales and a moving window approach was used to examine how LRD varied with computational scale and location along the island. The resulting LRD matrices were plotted by latitude to place the results in context of previously identified variations in the

framework geology. Results indicate that the LRD is not constant alongshore for all surface morphometrics. Many flares in the LRD plots correlate to relict infilled paleo-channels in the framework geology, indicating that the framework geology has a significant influence on the morphology of PAIS. Barrier island surface morphology LRD is strongest at large paleo-channels and decreases to the north. The spatial patterns in LRD surface morphometrics and framework

geology variations demonstrate that the influence of paleo-channels in the framework geology can be asymmetric (i.e. affecting beach-dune morphology preferentially in one direction alongshore) where the alongshore sediment transport gradient was unidirectional during island development.

The asymmetric influence of framework geology on coastal morphology has long-term

25 implications for coastal management activities because it dictates the long-term behavior of a barrier island. Coastal management projects should first seek to ~~assess~~understand how the framework geology and understand how influences coastal processes in order to more effectively balance long-term natural variability with short-term societal pressure.

## 1 Introduction

30 Since modern barrier island morphology is the product of past and present coastal processes acting over pre-existing morphologies, effective barrier island management requires a comprehensive knowledge of how an island has evolved to its current state in order to understand how it may change in the future. Continued sea level rise and future climatic uncertainty represent significant concerns about the resiliency of barrier islands and threats to many coastal communities (U.S. Environmental Protection Agency, 2016). Barrier island geomorphology can exhibit  
35 considerable variability alongshore, leading to varying responses to storm activity that ultimately determines the response of the island to sea level rise. Understanding the source of variability in beach and dune morphology can provide insight into how the barrier island is likely to change in response to future storms ~~and sea level rise, which ultimately determines how the island will~~  
40 ~~respond to sea level rise.~~

Storm waves interact with the variable morphology of the nearshore, beach, and dunes to determine ~~patterns of how~~ vulnerability ~~varies~~ along a barrier ~~island~~. To some degree, variations in the nearshore, beach, and dune morphology are influenced by the framework geology (Hapke et al., 2010; Hapke et al., 2016; Houser et al., 2008; Houser, 2012; Houser et al., 2018a; Riggs et al., 1995). In this paper, the term “framework geology” is defined as any subsurface variation in  
45 geologic structure, where ~~variability in~~ geologic structure can ~~be caused by result from~~ variations in sediment type (*i.e.* sand vs. silt), differences in compaction, or significant changes in the subsurface organic content or mineralogy. This term encompasses the subsurface and bathymetric geologic structure (onshore and offshore), which may include rhythmic bar and swale structures  
50 (Houser and Mathew, 2011; Houser, 2012), shoreface attached sand ridges (SASR) overlying offshore glacial outwash headlands (Hapke et al., 2010; Schwab et al., 2013), or buried infilled

paleo-channels (Anderson et al., 2016; Browder and McNinch, 2006; Fisk, 1959; McNinch, 2004; Schupp et al., 2006; Simms et al., 2010). Since the framework geology can provide insight into historical patterns of island transgression (Hapke et al., 2016; Houser, 2012; Houser et al., 2015; 55 Lentz et al., 2013), it is vital to better understand how the framework geology influences variability in modern beach and dune morphology (Cooper et al., 2018). Despite its importance, framework geology remains absent from contemporary barrier island change models that treat the geology as being uniform alongshore (Goldstein and Moore, 2016; Goldstein et al., 2017; Gutierrez et al., 2015; Moore et al., 2010; Murray et al., 2015; Plant and Stockdon, 2012; Wilson et al., 2015). 60 Sections of a barrier island that experience greater washover will experience a net loss of sediment landward and localized erosion, but the dissipative nature of shoreline change (see Lazarus et al., 2011) means that those losses are distributed alongshore. In this respect, the variation in beach and dune morphology alongshore forced by the framework geology can influence the rate of historical shoreline retreat and island transgression and need to be considered in models of barrier island 65 response to sea level rise.

The influence of framework geology on barrier island morphology is well documented by work along the New York, Florida, and North Carolina coasts. Submerged glacial outwash headlands along Fire Island, NY [are](#) reflected in the nearshore bathymetry as a series of shore-oblique ridges and swales (Hapke et al., 2010; Schwab et al., 2013). The nearshore bathymetry 70 impacts sediment transport gradients along the island, which has implications for beach and dune response and recovery following a storm (Brenner et al., 2018). Using sediment cores in conjunction with ground-penetrating radar (GPR) and seismic surveys, Houser (2012) demonstrated that variations in shoreline change patterns, beach width, and dune height corresponded to ridges and swales at Pensacola, FL. Shoreline position was more stable along the

75 ridges, resulting in a wider beach (~~Houser, 2012). The wider beach, in turn, which~~ provided more  
sediment for onshore winds to create ~~taller-higher~~ and more persistent dunes (Houser, 2012).  
Paleo-channels dissecting the southeastern U.S. Atlantic coast also align with hotspots of shoreline  
change (Lazarus et al., 2011; Schupp et al., 2006). However, Lazarus et al., ([2011: p.1](#)) argued that  
80 “*shoreline change at small spatial scales (less than kilometers) does not represent a peak in the  
shoreline change signal and that [shoreline] change at larger spatial scales dominates the  
[shoreline change] signal*”. This implies that variations in the framework geology, such as paleo-  
channels, do not influence long-term shoreline change, but, as noted, shoreline change is  
influenced by the alongshore variation in beach and dune morphology, ~~and th~~The dissipative  
behavior of shoreline change does not negate the importance of framework geology. ~~In addition to~~  
85 ~~framework geology, While the~~ alongshore variation in dune morphology is also influenced by the  
distribution of vegetation in both space and time (Goldstein et al., 2017; Lazarus et al., 2011;  
Lazarus, 2016), ~~the creating a self-organized behavior that of the dune morphology~~ is ultimately  
set up by ~~the variation in beach and dune morphology forced by~~ the framework geology (see  
Houser, 2012; Stallins and Parker, 2003; Weymer et al., 2015b).

90 The purpose of this paper is to test the hypothesis that relict infilled paleo-channels in the  
framework geology of a barrier island play a significant role and have an asymmetric in  
influencing on the alongshore variation in beach and dune morphology at a range of alongshore  
length scales. Based on the combination of a variable framework geology and a dominant  
alongshore current it is feasible that the framework geology may influence barrier island  
95 geomorphology at discrete spatial scales and that this influence may be asymmetric. Central to this  
hypothesis is the idea that the modern island morphology itself is scale-dependent, which has been  
proposed and supported by previous studies (Houser, 2012; Houser et al., 2015; Lazarus et al.,

2011; Lazarus and Armstrong, 2015; Lazarus, 2016). Padre Island National Seashore (PAIS) on North Padre Island, Texas, represents an ideal location to test this hypothesis because previous studies have documented significant variability in the subsurface framework geology (Fig 1; Anderson et al., 2016; Fisk, 1959; Wernette et al., 2018; Weymer et al., 2018; Weymer, 2012, 2016) and there is substantial alongshore variation in beach and dune morphology. Given that the dominant current along the central Texas coast flowed from north to south during the Holocene (Sionneau et al., 2008), it follows that the dominant alongshore sediment transport gradient during that time also flowed from north to south. It is feasible that paleo-channels along PAIS would have had interacted with the southerly alongshore current and sediment transport to asymmetrically influence barrier island geomorphology during island transgression. In this scenario, areas updrift of a paleo-channel would be distinctly different from areas downdrift of the paleo-channel, because the channel acts as a uni-directional sediment sink in the coastal sediment budget during island development. ~~Given the complexity of the PAIS framework geology, the results of this paper are valuable to managing coastal resources in other areas with complex underlying and offshore framework geology.~~

## 2 Methods

### 2.1 Regional Setting

Padre Island National Seashore encompasses a large portion of North Padre Island, the longest continuous barrier island in the world. Located along the south Texas, USA coast, PAIS represents an ideal location to quantify the alongshore influence of framework geology on barrier island geomorphology because of the multiple previously identified paleo-channels dissecting the island (Fig. 1; Anderson et al., 2016; Fisk, 1959; Simms et al., 2007). Similarly, the modern surface



morphology varies alongshore. Central PAIS is characterized by large, relatively continuous dunes, compared to the elongated parabolic dunes along northern PAIS and the heavily scarped and dissected dunes in southern PAIS. Padre Island is separated from the mainland by Laguna Madre, Baffin Bay, and the Intracoastal Waterway (ICW), which was dredged during the 1950s.

125 Multiple paleo-channels dissect the framework geology of central PAIS and Laguna Madre (Fig. 1; Fisk, 1959). These channels were suggested to have been incised into the Pleistocene paleo-surface and infilled during Holocene transgression. The prevailing theory of formation of PAIS is that the island was initially a series of disconnected barrier islands during the last glacial maximum (~18ka), when a series of channels were incised into the paleo-topographic surface  
130 (Weise and White, 1980). Rapid sea level transgression during the late-Pleistocene and Holocene drowned the relict dunes and submerged other dunes located approximately 80 km inland [from the last glacial maximum \(LGM\) shoreline](#), resulting in disconnected offshore shoals in the current location of PAIS. The disconnected shoals coalesced around 2.8 ka because sand from the relict Pleistocene dunes (~80 km offshore [from the LGM shoreline](#)) and sediment discharged from rivers  
135 was reworked via alongshore currents, resulting in a continuous subaqueous shoal. Eventually, sediment from offshore relict dunes and increased river discharge supplied enough sediment to the shoals that they aggraded vertically, becoming subaerially exposed in the same location as the modern barrier island (Weise and White, 1980).

A series of studies in the Gulf of Mexico have focused on extracting a buried ravinement  
140 surface, also referred to as the marine isotope stage (MIS) II paleo-surface and buried Pleistocene surface, including the area offshore of PAIS (Fig. 1; Anderson et al., 2016; Fisk, 1959; Simms et al., 2010). Maps of the MIS II surface indicate that PAIS is dissected by at least two substantial paleo-channels. One large channel dissects PAIS at an oblique angle near “the hole” in Laguna

Madre, an area immediately landward of PAIS characterized by consistently deeper water (Fisk, 1959). Based on knick points in the MIS II paleo-surface, this large channel appears to meander from a northeasterly orientation to easterly orientation as it crosses PAIS, eventually flowing into a large paleo-channel adjacent to Baffin Bay. The large paleo-channel forming Baffin Bay is the combined ancestral Los Olmos, San Fernando, and Patronila Creeks (LOSP), which was drowned during sea level transgression and eventually filled with sediment (Simms et al., 2010). Complexities in the framework geology and modern island geomorphology, coupled with the fact that PAIS framework geology has already been mapped, make PAIS an ideal location to examine how framework geology influences barrier island geomorphology.

Previous studies of PAIS have utilized geophysical surveys and sediment cores to document variation in the depth to a buried Pleistocene paleo-surface (Anderson et al., 2016; Fisk, 1959; Wernette et al., 2018; Weymer et al., 2016). Weymer et al. (2016) confirmed paleo-channels in the buried Pleistocene paleo-surface using a 100 km alongshore electromagnetic induction (EMI) survey, where areas of lower apparent conductivity are indicative of a deeper buried surface based on the difference in conductivity between overlying Holocene sand and the buried silty clay Pleistocene paleo-surface. Areas where the subsurface apparent conductivity decreased alongshore coincided with paleo-channels which had been previously mapped. Wavelet decomposition of the alongshore EMI survey and offshore bathymetry serve as proxies for the onshore and offshore framework geology, respectively. When analyzed and interpreted in conjunction with alongshore beach and dune morphometrics, these metrics reveal that larger beach and dune systems are located within the previously mapped paleo-channels (Wernette et al., 2018). The current paper expands on previous research by adapting economic forecast models to determine how paleo-channels in the framework geology have influenced beach and dune evolution and whether this influence is

directional and scale-dependent. Identifying these spatial lags, their spatial scale(s), and their lag direction(s) is the first step toward integrating this information into morphodynamic prediction models.

170

## 2.2 Data sources and validation

Examining the relationships between surface and subsurface barrier island geomorphology requires continuous alongshore data for surface morphology and subsurface framework geology. Barrier island surface morphometrics (*i.e.* beach width, beach volume, dune toe elevation, dune crest elevation, dune height, dune volume, island width, and island volume) were extracted every 175 1 m along the entire length of PAIS using an automated multi-scale approach (Wernette et al., 2016). This approach is advantageous because it is less subjective and more efficient than conventional approaches to extracting island morphology. ~~It is important to note that Long-term shoreline change (1950-2007) was not used in this analysis because previous research demonstrates that fine-scale and shorter-term changes are unlikely to persist given that there has not been ample storm activity to continually force the modern beach dune morphology at shorter-term variations in shoreline change at PAIS is decoupled from shoreline change processes~~ (Houser et al., 2018b). Offshore bathymetric depth profiles were extracted every 1 m from a National Geophysical Data Center (NGDC) coastal relief model (CRM; Fig. 1).

180

Dune height is an important morphometric to examine the influence of framework geology on barrier island morphology, since initial patterns in dune height and dune crest elevation can persist through time (Houser, 2012; Lazarus, 2016; Weymer et al., 2015b) and determine the response of a barrier island to storms (Sallenger, 2000). Areas of tall high dunes are more likely to limit washover and inundation during a storm, and instead sediment is likely to be partially eroded

185

190 from the dune and deposited on the beach and nearshore (Houser, 2012; Sallenger, 2000).  
Following the storm, sediment deposited in the nearshore is available for beach recovery through  
nearshore bar migration and welding. Onshore winds can transport sediment inland (i.e. from the  
beach to dune) following a storm, promoting dune recovery and development. Conversely, areas  
with shorter~~lower~~ or no dunes are more likely to be overwashed or completely inundated, resulting  
195 in the net landward transportation of sediment to the backbarrier. Since dune sand is not deposited  
in the nearshore or along the beach during the storm, sediment is not available for nearshore, beach  
and, eventually, dune recovery. In this way, variations in dune height and dune crest elevation are  
likely to persist through time by directly affecting patterns of overwash and represent a control on  
patterns of coastal resiliency and shoreline change. Identifying processes that set up modern  
200 patterns in dune morphology provides valuable insight into how the barrier island formed and how  
it continues to be influenced by the framework geology. Since dune height and development is  
partially a function of beach width, it follows that beach width is a valuable morphometric to  
evaluate for patterns of long-range dependence (LRD) and short-range dependence (SRD).

205 Information about the subsurface framework geology of the coast was derived from a ~100  
km alongshore EMI survey (Wernette et al., 2018; Weymer et al., 2016). EMI works by inducing  
a primary electromagnetic field in the subsurface half-space and measuring the deformation (i.e.  
response) of a secondary current. From the secondary field deformation, it is possible to compute  
the apparent conductivity of the half-space at a specific frequency. While the apparent conductivity  
210 is influenced by a multitude of factors (Huang and Won, 2000; Huang, 2005), recent fieldwork  
suggests that hydrology has a minimal influence on the subsurface conductivity at PAIS at broad  
geographic scales, relative to the influence of stratigraphic and lithologic variation. A series of

piezometer shore-normal transects were collected in fall 2016, which indicated that sand was dry within the first 2 meters of the surface along the back beach. Since the EMI surveys were collected along the back beach, the piezometer measurements support the use of EMI as a proxy for the subsurface framework geology. Previous research used EMI surveys to confirm the location of several paleo-channels and begin to quantify their influence on coastal geomorphology~~based on~~ EMI surveys (Wernette et al., 2018; Weymer, 2016), while the current paper aims to determine the alongshore influence (direction and scale) of the paleo-channels.

### 2.3 Statistical Modeling of Spatial-Series

Previous research demonstrates that island morphology and framework geology can be spatially variable at multiple scales alongshore (Hapke et al., 2016; Lentz and Hapke, 2011; Schwab et al., 2013; Wernette et al., 2018; Weymer, 2012; Weymer et al., 2015a; Weymer, 2016); however, previous approaches utilized models unable to identify spatial lags that may occur given alongshore sediment transport gradients. Since the goal of this paper is to evaluate short- and long-range dependencies (SRD and LRD, respectively) of island morphology and framework geology and to test whether there is directional dependence in island morphology, the current study requires a statistical model capable of accounting for SRD and LRD. Short-range dependence includes localized relationships in the data series, such as autoregressive or moving average, there LRD is the dependence of values on all other data values within the data series, irrespective of trend or window size. While fractal Gaussian noise (fGn) and fractal Brownian motion (fBm) models can model the SRD, both are unable to model the LRD of a series because both models are limited to two parameters (fGn: range and standard deviation; fBm: variance and scaling). Therefore, we

235 used an autoregressive fractionally-integrated moving average (ARFIMA) model to capture the  
LRD of a data series.

ARFIMA models may be considered a special case of autoregressive moving average  
(ARMA) models that have been most widely applied in predicting financial market behavior;  
however, it is possible to analyze spatial data series by substituting space for time. The most  
240 significant advantage of ARFIMA models over ARMA, fGn, and fBm models is its potential to  
account for autoregressive (AR) relationships, LRD, and moving average (MA) relationships  
simultaneously through fitting  $p$ ,  $d$ , and  $q$  parameters, respectively. Many ARFIMA models utilize  
all three parameters simultaneously to describe a data series, although it is possible to isolate the  
influence of AR, LRD, or MA within the data in order to better understand more specifically how  
245 the data is structured (Fig. 2). By isolating one of the three parameters, it is possible to distinguish  
the degree to which LRD influences a data series, independent of any SRD influence. This ability  
to distinguish and isolate LRD from SRD is unique and represents the most significant reason that  
ARFIMA models were used to test for directional dependencies in coastal geomorphology.

The  $p$  and  $q$  parameters provide information about SRD structures within the data series,  
250 representing AR and MA, respectively. Data series modelled with high  $p$  values are those where  
the data value at particular location is dependent on the trend in nearby values. For example, large  
jetties or groins can affect the overall alongshore sediment transport (Fig. 2a and 2b), trapping  
sediment on the updrift side of the structure and starving downdrift areas of beach sediment.  
Alongshore beach-dune metrics, such as beach volume, provide valuable information about the  
255 alongshore influence of the coastal engineering structures. Using an ARMA model to characterize  
the data series, we would find that  $p$  values are very high adjacent to the jetties and decrease  
moving away from the structure (Fig. 2a). This simple AR relationship between the structures and

beach volume is effectively represented by the  $p$  parameter because this relationship is relatively localized to either side of the structures and the data series does not extend for several kilometers  
260 alongshore. Moving beyond the accumulated sediment on the updrift side or shadow on the  
downdrift side of the jetties,  $p$  parameter values decrease. It is important to note that the  $p$   
parameter is useful for modelling localized AR relationships; however, given a more complex  
and/or substantially larger data series, the  $p$  parameter is less likely to capture directional trends  
simply due to the increased “noise” inherent with larger data series. In other words, the AR  
265 relationships may become obfuscated with increasingly large and/or complex data series.

Data series modelled with high  $q$  values also exhibit strong local dependence, although the  
data value at a particular location is dependent not on localized directional trends, but, on the  
average of nearby values (*i.e.* moving average). For example, assuming a groin field is effectively  
able to trap sediment and build a stable beach, the influence of these structures on beach volume  
270 can be effectively captured by the  $q$  parameter (Fig. 2b). The  $q$  parameter values for beach volume  
are much higher within the groin field than outside of the field because the beach volume is being  
influenced by sediment trapped updrift and downdrift of a specific point. Similar to the  $p$   
parameter, it is important to note that the effectiveness of using  $q$  parameter values to identify MA  
relationships decreases with increasing data series complexity and/or length. MA relationships are  
275 less evident in larger or very complex series simply because of the “noise” within the larger data  
series.

Unlike ARMA models which only utilize the  $p$  and  $q$  values, ARFIMA models include an  
additional  $d$  parameter that can vary fractionally and provides information about the degree to  
which values within the series are dependent on all other values in the series, not simply localized  
280 effects (*i.e.* moving average and autoregressive). This  $d$  parameter makes ARFIMA particularly

well suited for modelling series with broad-scale dependencies (Fig. 2c). In the case of coastal geomorphology,  $d$  parameter values may be particularly useful for identifying the influence of very broad-scale influencing factors, such as paleo-channels in the framework geology (Weymer et al., 2018; Weymer, 2016).

285 ARFIMA modeling in the geosciences remains relatively unexplored, despite its potential for better understanding spatial and temporal patterns of variability in complex datasets. While previous research demonstrated that ARFIMA modelling can provide insight into long-range dependence patterns in alongshore barrier island surface and subsurface morphology at discrete scales (Weymer et al., 2018; Weymer, 2016), the current paper expands the ARFIMA approach to  
290 analyze alongshore morphometrics at all scales along the entire length of spatial data series. In other words, while previous research discretized a data series into ~~utilized~~ arbitrary alongshore lengths and locations to characterize LRD along PAIS, the current paper assesses LRD at all alongshore length scales along the entire length of PAIS. In this sense, the current paper presents a new approach to assessing how LRD changes alongshore and interprets these changes with  
295 respect to coastal processes and barrier island evolution. While wavelet decomposition can provide insight into relationships between two variables in the same location (SOURCE), utilizing ARFIMA as a sliding window across multiple spatial scales can shed light on relationships that exhibit a lag in one or both directions. The advantage of this new approach is its application to examine alongshore influences of various natural and anthropogenic features (e.g. jetties, seawalls, groin fields, paleo-channels, and/or headlands) and identify their effective zone(s) of influence on coastal processes and geomorphology.

300 In this paper, the effects of LRD within each spatial data series was isolated using a  $0, d, 0$  ARFIMA model. Each ARFIMA model was fit using the *fracdiff* package Fraley et al., 2012 in R

Formatted: Font: Bold



R Core Team, 2016, where the  $p$  and  $q$  parameters were set equal to 0. Setting both  $p$  and  $q$  parameters to 0 eliminates the short-range autoregressive and moving average terms from the fitted models. Each surface, subsurface, and bathymetric spatial data series contains 96,991 measurements in total. Each spatial series was divided into ~250 unique computational windows, corresponding to alongshore length scales, ranging from two observations (2 m alongshore length scale) to the entire 96,991 observations (96,991 m alongshore length scale). While the number of computational windows can be decreased, or increased, it is important to note that the ARFIMA modelling process is computationally intensive, requiring days to complete analysis of a single spatial data series on a high-performance desktop computer. Increasing the number of computational windows would provide more detailed information about the structure of the dataset but would significantly increase the computing power required to fit the models. Decreasing the number of computational scales would decrease the computing power required and speed up the computations; however, it would become more difficult to resolve the scales at which the structure breaks down. The range of computational windows could also be adjusted to a specific range, depending on the objectives of the research. At each scale the computational window is moved along the dataset and the appropriate  $d$  parameter is computed. The fitted  $d$  parameter is then assigned to the center of the window at the corresponding length scale. Repeating this process for each alongshore length scale yields a matrix of values, where the row corresponds to the alongshore length scale of the data subset used to compute the  $d$  parameter, and the column represents the alongshore location of the center of the computational window. This matrix can be plotted similar to a wavelet plot to examine spatial patterns of LRD throughout the entire dataset at all length scales.

#### 2.4 Interpreting LRD Plots

Figure 3 represents a sample LRD plot using a 10-km alongshore portion of PAIS dune height, where the x-axis represents the alongshore position or space (in meters) and the y-axis represents the alongshore spatial scale (in meters). Plots are oriented by latitude on the x-axis, from south (left) to north (right). In this paper, all plots utilize a color ramp from blue to red, where blue hues represent smaller  $d$  parameter values and red hues represent larger  $d$  parameter values. Given this color scheme, locations or segments of the data lacking LRD are likely to appear as ‘flares’ or flames. Each of the flares, such as the flare at location A, represent the scale and areas of the dataset where LRD begins to break down in favor of SRD. LRD dominates at a particular location at a broad spatial scale (indicated by red hues) and becomes less influential as the spatial scale becomes increasingly finer (indicated by the transition from red to yellow to blue hues). In the case of the flare at location A (Fig. 3) we can see that the dune height series exhibits strong LRD at scales broader than ~20 km alongshore. This suggests that dune height at location A is related to adjacent values down to ~10 km on both sides of A. Morphology at scales finer than ~20 m is more locally dependent. In this respect, ARFIMA represents an approach to determine the limiting scale to self-similarity.

Depending on the structure of the morphology and/or geology, it is feasible that the LRD may not appear to be symmetrical. Long-range dependence is asymmetric at location B, where the LRD begins to break down more rapidly to the right side of the plot than the left. While the physical interpretation of a LRD plot depends on the variable, asymmetric flares can be broadly interpreted as areas where the variable is more locally dependent on the surrounding values at the scales and in the direction that the flare is oriented. In the case of flare B, dune height is more dependent on adjacent values to the north up to ~39 km alongshore. Asymmetries in the LRD plots can provide

350 valuable information about the underlying structure influencing the variable of interest.

### 3 Results

355 Subsurface apparent conductivity exhibits substantial LRD along the entire length of PAIS (Fig. 4a). Patterns in the subsurface framework geology LRD plot demonstrate that the framework geology is self-similar at broader scales, and that this structure varies alongshore at finer alongshore length scales which correspond to the scale of the previously identified paleo-channels. The large LRD values at broad spatial scales (Fig. 4a) demonstrate that the paleo-topographic structure dominated by broad-scale coastal curvature over very broad spatial scales. Since the framework geology reflects the paleo-topography and the modern barrier island surface is  
360 dissipative at very broad scales, based on large LRD values at broad scales in the modern barrier island morphology, it follows that the framework geology is dissipative. The substantial LRD along much of the island supports previous work by Weymer (2016) and Weymer et al. (2018), which demonstrated that subsurface framework geology exhibits LRD at discrete locations and alongshore length scales.

365 The shoreline change LRD plot exhibits the greatest LRD values (*i.e. highest LRD values* across all broad spatial scales) along the length of PAIS, as indicated by the dominance of red hues in (Figure 4b). Most flares present in the shoreline change LRD are at relatively fine spatial scales, shorter than a few kilometers. Peaks in the shoreline change LRD plot are very narrow, which we interpret to mean suggesting that the long-term shoreline change is dominantly  
370 dissipative with only minor undulations due to localized coastal processes, consistent with the findings of Lazarus et al. (2011) who demonstrated that broad-scale and long-term shoreline change is dissipative. Waves impacting the coast can erode sediment from one area and transport

Formatted: Font: Italic

it to another area, resulting in undulations in the shoreline orientation. Since long-term shoreline change is the result of cumulative daily wave processes eroding undulations in the shoreline shape and dissipating any short-term undulations, fine-scale variations in the nearshore bathymetry, such as nearshore bars and troughs, can affect patterns of erosion and deposition along the coast over longer periods of time (Hapke et al., 2016). Therefore, it follows that the long-term shoreline change LRD plot would exhibit a large amount of LRD.

Beach width LRD is more variable than shoreline change (Fig. 4c), with the least amount of variability concentrated in approximately the southern third of the island. ~~Flares in the These flares southern third of PAIS~~ are likely present because transverse ridges in the nearshore bathymetry affect localized wave refraction patterns, thereby influencing fine-scale patterns in beach morphology. Patterns in the beach morphology in southern PAIS are likely more localized because the incoming wave energy is refracted around the transverse ridges, which impacts sediment transport gradients along this part of the island. Any variations in beach morphology are more locally influenced by relatively closely spaced transverse ridges (~0.8 km to 1.5 km alongshore spacing), resulting in broad-scale LRD along southern PAIS.

The central third of PAIS beach width is characterized by several significant flares in LRD, with many of the strongest flares adjacent to infilled paleo-channels previously identified by Fisk (1959) (Figs. 4c and 5a). The scale at which LRD transitions to SRD is at the broadest alongshore length scales proximal to Baffin Bay and this threshold decreases in scale to the north (Figs. 4c and 6a). Given a dominant southerly alongshore current during island development in the Holocene (Anderson et al., 2016; Sionneau et al., 2008) and corresponding southerly sediment transport gradient, patterns in the beach morphology LRD plot suggests that the paleo-channels are asymmetrically influencing beach morphology. ~~It is plausible that paleo-channels acted as~~

~~sediment sinks during barrier island formation~~—Simms et al. (2010) presented seismic profiles extending from north to south across the ancestral LOSP Creeks, which exhibit a series of onlapping reflectors on the northern edge of the seismic profiles. These onlapping reflectors are indicative of deposition on the northern edge of the paleo-channel, and support the hypothesis that alongshore spit development occurred within the LOSP Creeks paleo-channel. The beach north of the large paleo-channel identified by Fisk (1959) would have been nourished by sediment discharged from the ancestral LOSP Creeks, now forming Baffin Bay. Similarly, the beach north of the ancestral LOSP Creeks paleo-channel may have been nourished by sediment from the ancestral Nueces River. In this way, beach morphology updrift of the large paleo-channels would impact beach morphology within and south of the large paleo-channels.

Alongshore LRD in the dune crest elevation and dune height varies similarly to beach width LRD along PAIS (Figs. 4e, 4f, 5b, 5c, 6b, and 6c). The southern third of PAIS is characterized by LRD-SRD transitioning at finer alongshore length scales than the northern two-thirds of the island, as indicated by the flares in the dune height LRD plot (Figs. 4e and 4f). The most significant flares are proximal to the ancestral LOSP Creeks paleo-channels dissecting central PAIS and the ancestral Nueces River paleo-channel extending into Baffin Bay (Fig. 6). Given that the dominant alongshore sediment transport gradient is from north to south and that the beach morphology exhibits an asymmetric LRD to the north of the large paleo-channels, it follows that LRD and SRD patterns in dune morphology would exhibit similar asymmetry to beach morphology.

The transition from dune height LRD to SRD occurs at the largest scale, *i.e.* approximately at 35 km alongshore length scales (Figs. 4f and 6c). This maximum occurs at the southern edge of the ancestral LOSP Creeks paleo-channel, adjacent to Baffin Bay (Fig. 6c). The alongshore length

scale can be interpreted as the alongshore distance that the paleo-channel affected wave refraction  
420 patterns and sediment distribution along the beach, ultimately affecting sediment supply to develop  
larger dunes. It follows that paleo-channel influence on dune crest elevation and dune height would  
be asymmetric, with greater LRD to the north of the paleo-channels, assuming paleo-channels  
inhibited southern alongshore sediment transport and starved the beach downdrift. The wide beach  
updrift of a paleo-channel represents a larger sediment supply and greater fetch for aeolian  
425 transport and dune growth and is consistent with peaks in dune height identified by Wernette et al.  
(2018).

Island width exhibits the greatest alongshore variability in LRD of all island and framework  
geology morphometrics (Fig. 4g) and demonstrates that island width is dependent on broad- and  
fine-scale patterns of change. Areas of ~~short-low~~ dunes are likely to be overtopped during a storm,  
430 transporting sediment to the landward margin of the island. Waves and currents along the landward  
margin of the island erode the washover fans and redistribute sediment along the island. In this  
sense, the island width at one location is directly influenced by sedimentation patterns along the  
adjacent parts of the island. Undulations in the Gulf of Mexico shoreline are smoothed out over  
the long-term, thereby reducing the likelihood that patterns in island width are solely caused by  
435 shoreline change patterns. This repeat washover, followed by sediment redistribution along the  
backbarrier shoreline, represents the mechanism that-by which barrier islands can transgress  
landward and keep up with sea level rise. ~~The island width LRD plot demonstrates that island~~  
~~width is dependent on broad- and fine-scale patterns of change.~~

Bathymetric depth profiles at 2-km and 4-km offshore exhibit substantial LRD at broad  
440 scales but this breaks down at scales finer than ~15 km alongshore (Figs. 4h and 4i). Long-range  
dependence breaks down at larger alongshore length scales in the 2-km bathymetry, compared to

the 4-km bathymetry. Since modern coastal processes continue to affect alongshore sediment transport, large undulations in the bathymetry are smoothed out over time by sediment redistributed along the coast. Finer scale variations in the modern nearshore bathymetry occur at similar spatial scales as previously identified at PAIS (Wernette et al., 2018). The 2-km bathymetric profile LRD breaks down at broader spatial scales than the 4-km bathymetry (Figs. 4h and 4i). This suggests that localized variations in coastal processes manifest in the nearshore bathymetry closer to the shoreline. Wave shoaling and breaking will erode and deposit sediment along the coast, impacting bathymetric structure closer to the shoreline.

450 ~~Subsurface apparent conductivity exhibits substantial LRD along the entire length of PAIS (Fig. 4a). The substantial LRD along much of the island supports previous work by Weymer (2016) and Weymer et al. (2018), which demonstrated that subsurface framework geology exhibits LRD at discrete locations and alongshore length scales. Patterns in the subsurface framework geology LRD plot demonstrate that the framework geology is self-similar at broader scales, and that this structure varies very little alongshore and with scale. The large LRD values at broad spatial scales (Fig. 4a) demonstrate that the paleo-topographic structure is trending towards a homogenous surface over very broad spatial scales. Since the framework geology reflects the paleo-topography and the modern barrier island surface is dissipative at very broad scales, based on large LRD values at broad scales in the modern barrier island morphology, it follows that the framework geology is dissipative.~~  
455 ~~The substantial LRD along much of the island supports previous work by Weymer (2016) and Weymer et al. (2018), which demonstrated that subsurface framework geology exhibits LRD at discrete locations and alongshore length scales.~~  
460 The substantial LRD along much of the island supports previous work by Weymer (2016) and Weymer et al. (2018), which demonstrated that subsurface framework geology exhibits LRD at discrete locations and alongshore length scales.

#### 4 Discussion

465 ~~Dune height is an important morphometric to examine the influence of framework geology  
on barrier island morphology, since initial patterns in dune height and dune crest elevation can  
persist through time (Houser, 2012; Lazarus, 2016; Weymer et al., 2015b) and determine the  
response of a barrier island to storms (Sallenger, 2000). Areas of tall dunes are more likely to limit  
washover and inundation during a storm, and instead be partially eroded from the dune and  
470 deposited on the beach and nearshore (Houser, 2012; Sallenger, 2000). Following the storm,  
sediment deposited in the nearshore is available for beach recovery through nearshore bar  
migration and welding. Onshore winds can transport sediment inland (i.e. from the beach to dune)  
following a storm, promoting dune recovery and development. Conversely, areas with shorter or  
no dunes are more likely to be overwashed or completely inundated, resulting in the net landward  
475 transportation of sediment to the backbarrier. Since dune sand is not deposited in the nearshore or  
along the beach during the storm, sediment is not available for nearshore, beach and, eventually,  
dune recovery. In this way, variations in dune height and dune crest elevation are likely to persist  
through time by directly affecting patterns of overwash and represent a control on patterns of  
coastal resiliency and shoreline change. Identifying processes that set up modern patterns in dune  
480 morphology provides valuable insight into how the barrier island formed and how it continues to  
be influenced by the framework geology. Since dune height and development is partially a function  
of beach width, it follows that beach width is a valuable morphometric to evaluate for patterns of  
~~LRD and SRD.~~~~

As noted, flares in the LRD plots are interpreted as areas where the morphometrics are  
485 more locally dependent on the adjacent values. Since flares in the LRD plots of surface  
morphometrics are most pronounced adjacent to the infilled paleo-channels and decrease to the



north (Figs. 4, 5, and 6), this spatial correlation supports the hypothesis that the modern barrier island morphology was influenced by variations in the framework geology. Paleo-channels along PAIS range in scale, with the smallest channels only ~13 m below the modern surface and the deepest and widest channels ~50 to ~64 m deep. Regardless of the paleo-channel dimensions, patterns in the LRD plots demonstrate that paleo-channels affect the nearshore bathymetry and modern island morphometrics asymmetrically and decrease in minimum alongshore scale to the north. Beach and dune morphology updrift of a paleo-channel directly affects sediment available for areas of the beach downdrift. In this way, larger paleo-channels (depth and width) will have a greater accommodation space and influence beach-dune morphology along a greater stretch of coast, while smaller paleo-channels have a more limited accommodation space and, therefore, influence a smaller stretch of adjacent coastal morphology. Given that a paleo-channel would have acted as a sediment sink for excess sediment transported alongshore during sea level transgression, it follows that LRD values would remain high at fine spatial scales updrift of the paleo-channel locations (Figs. 5 and 6).

The current paper is in agreement with previous research that demonstrates barrier island morphology is dissipative at broad spatial scales (Wernette et al., 2018; Lazarus et al., 2011). Long-range dependence is significant at very broad spatial scales in all island morphometrics except for island width. Previous research also demonstrates that rhythmic undulations and isolated paleo-channels can influence short-term shoreline change patterns (Lazarus et al., 2011; McNinch, 2004; Schupp et al., 2006) and beach and dune morphology (Houser et al., 2008; Houser and Barrett, 2010). This paper presents new information supporting the hypothesis that paleo-channels in the framework geology asymmetrically interact with alongshore currents to drive asymmetries in influence barrier island geomorphology and that the scale of influence is ultimately limited. This

510 asymmetry is likely caused by paleo-channels acting as sediment sinks for sediment transported south by a prevailing southerly alongshore current during barrier island formation.

The alongshore distance that variations in the framework geology influence beach and dune morphology is dependent on paleo-channel scale and orientation, relative to the average shoreline orientation. Long-range dependence plots of beach and dune morphometrics suggest that beach and dune morphology within the largest paleo-channel dissecting the island, the ancestral LOSP Creeks, was influenced by beach and dune morphology up to 25 km north of the channel edge (Figs. 4c, 4d, 4e, 4f, 5 and 6). The large paleo-channel identified by Fisk (1959) is slightly smaller in scale than the paleo-channel forming Baffin Bay; however, the large Fisk (1959) channel intersects the coast at an oblique angle. Since the channel dissects PAIS at an oblique angle, the influence of this channel is more apparent on beach morphology than dune morphology. An oblique channel would have required more sediment and take longer to fill than a shore-normal channel. Subsequently, a wide beach and dunes would begin to form in the shore-normal paleo-channel before the oblique paleo-channel. For an oblique paleo-channel the volume of sediment required to fill the channel from alongshore sediment transport and fluvial deposition from the mainland entering the channel would likely have been insufficient to build a wide beach to supply sediment for significant dune growth.

Paleocurrents during the Holocene were predominantly from north to south (Sionneau et al., 2008), which would have set up a southerly alongshore sediment transport gradient. Sediment transported from north to south along the coast would have nourished beaches updrift (*i.e.* north) of the channel. Consequently, nourished beaches updrift of the paleo-channel had a greater sediment supply and increased fetch for aeolian transport inland to promote large dune development (Bauer and Davidson-Arnott, 2002; Bauer et al., 2009). While beach nourishment

and dune growth continued updrift of the channel, excess sediment entering the channel was deposited along the updrift edge of the channel (Fig. 7). Deposition on the updrift edge was caused by the increased accommodation space within the channel. Increasing the area that the alongshore current flows through (*i.e.* transitioning from a confined alongshore current to an open channel), while maintaining the alongshore current discharge, resulted in a decreased flow along the northern edge. Reducing alongshore current velocity caused sands to be deposited along the northern edge of the channel (Fig. 7), while finer particles are transported farther into the channel and funneled offshore through the channel outlet. Given enough time and with continued sea level rise during the Holocene, this preferential deposition would have built a spit into the channel. Sediment trapped in the paleo-channel would be unavailable to the beach downdrift. The closest modern analogy to this alongshore sedimentation process is the formation and evolution of an alongshore spit forming a baymouth bar eventually completely crossing the outflowing river channel, where the river valleys can eventually become cut off by the elongating spit. In this case, sediment is supplied to the updrift beach and provides a sediment source for and build while large dunes can form/develop on the updrift side.

Directional dependencies in beach and dune morphology, initially set up by the interaction of framework geology with a dominant southerly alongshore current, persist through time due to preferential washover reinforcing pre-existing alongshore variation in dune height. Areas of the island with limited or no dune development are preferentially overtopped by elevated water levels during a storm. Conversely, areas with taller-higher dunes resist storm washover/inundation and recover more rapidly following a storm. Alongshore variations in the barrier island morphometrics, such as dune height, persist through time because these patterns are re-enforced by episodic washover of small dunes during storms.

The apparent disconnect between long-term shoreline change and framework geology is due to the cumulative influence of waves continuously interacting with the coast. This disconnect is further highlighted by the lack of storms impacting PAIS. Long-term shoreline change rate is the cumulative result of waves moving sediment ~~along the coast~~ on a daily basis, while short-term variations in shoreline position caused by storms are feasible. It is unlikely that short-term variations in PAIS shoreline position identified here are caused by storms because PAIS has not been significantly impacted by a storm since Hurricane Bret in 1999. Any short-term undulations in shoreline position are likely to disappear over longer-time scales, especially since no storm has hit the island to cause significant localized shoreline erosion. Therefore, the long-term shoreline change rate LRD (Fig. 4b) is unlikely to exhibit substantial variation alongshore. Beach, dune, and island morphology do show significant variation in patterns of LRD along PAIS (Figs. 4c, 4d, 4e, 4f, 4g, 5, and 6) because the initial barrier island morphology was set up by the framework geology.

If hurricanes had impacted PAIS more frequently, it is likely that the alongshore variations in dune morphology, which were initially set up by the paleo-channels, would have been reinforced. This is because areas set up as low dunes would be preferentially overwashed while areas of high dunes would be more resistant and resilient during and following a storm. Therefore, the impact of a hurricane would highlight alongshore variations in dune morphology set up by the paleo-channels.

Predicting future changes to barrier island geomorphology requires a comprehensive knowledge of how the framework geology affected initial variation in the beach and dunes.

Understanding how the framework geology influences barrier island geomorphology has important implications for understanding how barrier islands are likely to respond to and recover following a storm or series of storms. While many models of barrier island recovery focus on spatio-temporal models of change, Parmentier et al. (2017) demonstrated that spatial

autocorrelation outperformed temporal autocorrelation (*e.g.* “space-beats-time”, SBT) when  
580 predicting the recovery of vegetation following Hurricane Dean. Since vegetation recovery and  
dune geomorphic recovery are related (Houser et al., 2015), it follows that understanding spatial  
autocorrelation in beach and dune features is essential to predicting future changes to barrier island  
geomorphology. The current paper supports the conclusions of Parmentier et al. (2017) by  
demonstrating that spatial variations in the framework geology directly relate to alongshore  
585 variations in beach and dune morphology (Figs. 5 and 6). In context of SBT theory, results of the  
current paper support the hypothesis that spatial variations in the framework geology (*i.e.* ‘space’)  
control barrier island evolution (*i.e.* ‘time’). Accurately predicting future barrier island change is  
predicated on comprehensively understanding what processes influenced its initial formation and  
what processes continue to influence island morphology. Predicting coastal change without  
590 accounting for all factors affecting formation and evolution, such as directional dependencies due  
to framework geology, are more prone to uncertainty, which can have important managerial  
applications.

Given that framework geology influences beach and dune morphology along the coast, the  
methods and results of this paper represent an opportunity for managers to improve coastal  
595 nourishment engineering projects, such as beach nourishment. Sediment budget imbalances set up  
by the framework geology dictate long-term barrier island trajectory. Utilizing ARFIMA models  
to evaluate the alongshore beach and dune morphology can provide valuable insight into the coast  
is likely to change naturally in the future. To reduce waste by coastal nourishment, future projects  
should seek to first comprehensively understand how the paleo-topography of an area continues to  
600 affect coastal processes and morphology. By understanding the long-term influence of framework  
geology, coastal nourishment projects can more effectively balance how a project focused on the

near-future coastal morphology with long-term natural changes. ~~Although there is no single solution to managing coastal resources, effective long and short term management of coastal resource should seek to balance societal pressure with natural long term behavior to minimize economic and environmental loss.~~

## 5 Conclusion

This paper quantitatively demonstrates that variation in the framework geology influences patterns of beach and dune morphology along a barrier island. Understanding what controls beach and dune morphology and barrier island development is integral to predicting future changes to barrier island geomorphology and island transgression caused by storms and sea level rise. Storm impact and barrier island transgression patterns are controlled by beach slope, dune height, and wave run-up. Given a persistent alongshore sediment gradient during the Holocene, paleo-channels in the framework geology at PAIS likely acted as sediment sinks during island development. While wide beaches and, subsequently, large dunes are nourished with sediment updrift of the channel, excess sediment can become trapped in the channel. These channels trap sediment, starving sediment from downdrift portions of the coast. The result of this asymmetry in sediment supply is that large dunes occur updrift of the paleo-channel and small dunes occur downdrift of the paleo-channel. Effectively managing a barrier island underlain by a variable framework geology should seek to balance short-term societal pressures in context of long-term natural change (*i.e.* framework geology).

## Acknowledgements

Undergraduate student research assistants aided in fieldwork, with funding through a High-  
625 Impact Learning Experiences grant from the Texas A&M University College of Geosciences.  
Publication supported in part by an Institutional Grant (NA14OAR4170102) to the Texas Sea  
Grant College Program from the National Sea Grant Office, National Oceanic and Atmospheric  
Administration, U.S. Department of Commerce [Grant-in-Aid of Graduate Research] and the  
National Science Foundation [Doctoral Dissertation Research Improvement grant number  
630 1634077].

## References

- Anderson, J. B., Wallace, D. J., Simms, A. R., Rodriguez, A. B., Weight, R. W. R., and Taha, Z.  
P.: Recycling sediments between source and sink during a eustatic cycle: Systems of late  
635 Quaternary northwestern Gulf of Mexico Basin, *Earth-Science Reviews*, 153, 111-138,  
10.1016/j.earscirev.2015.10.014, 2016.
- Bauer, B. O., and Davidson-Arnott, R. G. D.: A general framework for modeling sediment supply  
to coastal dunes including wind angle, beach geometry, and fetch effects, *Geomorphology*, 49, 89-  
108, 2002.
- 640 Bauer, B. O., Davidson-Arnott, R. G. D., Hesp, P. A., Namikas, S. L., Ollerhead, J., and Walker,  
I. J.: Aeolian sediment transport on a beach: Surface moisture, wind fetch, and mean transport,  
*Geomorphology*, 105, 106-116, 10.1016/j.geomorph.2008.02.016, 2009.
- Brenner, O. T., Lentz, E. E., Hapke, C. J., Henderson, R. E., Wilson, K. E., and Nelson, T. R.:  
Characterizing storm response and recovery using the beach change envelope: Fire Island, New  
645 York, *Geomorphology*, 300, 189-202, 10.1016/j.geomorph.2017.08.004, 2018.
- Browder, A. G., and McNinch, J. E.: Linking framework geology and nearshore morphology:  
Correlation of paleo-channels with shore-oblique sandbars and gravel outcrops, *Marine Geology*,  
231, 141-162, 10.1016/j.margeo.2006.06.006, 2006.
- 650 Cooper, J. A. G., Green, A. N., and Loureiro, C.: Geological constraints on mesoscale coastal  
barrier behaviour, *Global and Planetary Change*, 168, 15-34, 10.1016/j.gloplacha.2018.06.006,  
2018.
- Fisk, H. N.: Padre Island and Lagunas Madre Flats, coastal south Texas, *Second Coastal  
Geography Conference*, 103-151, 1959.
- 655 Goldstein, E. B., and Moore, L. J.: Stability and bistability in a one-dimensional model of coastal  
foredune height, *Journal of Geophysical Research: Earth Surface*, 121, 964-977,  
10.1002/2015jf003783, 2016.

- Goldstein, E. B., Moore, L. J., and Durán Vinent, O.: Vegetation controls on maximum coastal foredune 'hummockiness' and annealing time, *Earth Surface Dynamics Discussions*, 1-15, 10.5194/esurf-2017-2, 2017.
- 660 Gutierrez, B. T., Plant, N. G., Thielert, E. R., and Turecek, A.: Using a Bayesian network to predict barrier island geomorphologic characteristics, *Journal of Geophysical Research: Earth Surface*, 120, 2452-2475, 10.1002/2015JF003671, 2015.
- Hapke, C. J., Lentz, E. E., Gayes, P. T., McCoy, C. A., Hehre, R., Schwab, W. C., and Williams, S. J.: A Review of Sediment Budget Imbalances along Fire Island, New York: Can Nearshore
- 665 Geologic Framework and Patterns of Shoreline Change Explain the Deficit?, *Journal of Coastal Research*, 263, 510-522, 10.2112/08-1140.1, 2010.
- Hapke, C. J., Plant, N. G., Henderson, R. E., Schwab, W. C., and Nelson, T. R.: Decoupling processes and scales of shoreline morphodynamics, *Marine Geology*, 381, 42-53, 10.1016/j.margeo.2016.08.008, 2016.
- 670 Houser, C., Hapke, C., and Hamilton, S.: Controls on coastal dune morphology, shoreline erosion and barrier island response to extreme storms, *Geomorphology*, 100, 223-240, 10.1016/j.geomorph.2007.12.007, 2008.
- Houser, C., and Barrett, G.: Divergent behavior of the swash zone in response to different foreshore slopes and nearshore states, *Marine Geology*, 271, 106-118, 10.1016/j.margeo.2010.01.015, 2010.
- 675 Houser, C., and Mathew, S.: Alongshore variation in foredune height in response to transport potential and sediment supply: South Padre Island, Texas, *Geomorphology*, 125, 62-72, 10.1016/j.geomorph.2010.07.028, 2011.
- Houser, C.: Feedback between ridge and swale bathymetry and barrier island storm response and transgression, *Geomorphology*, 173-174, 1-16, 10.1016/j.geomorph.2012.05.021, 2012.
- 680 Houser, C., Wernette, P., Rentschlar, E., Jones, H., Hammond, B., and Trimble, S.: Post-storm beach and dune recovery: Implications for barrier island resilience, *Geomorphology*, 234, 54-63, 10.1016/j.geomorph.2014.12.044, 2015.
- Houser, C., Barrineau, P., Hammond, B., Saari, B., Rentschlar, E., Trimble, S., Wernette, P. A., Weymer, B. A., and Young, S.: Role of the foredune in controlling barrier island response to sea
- 685 level rise, in: *Barrier Dynamics and Response to Climate Change*, edited by: Moore, L. J., and Murray, A. S., Springer, 2018a.
- Houser, C., Wernette, P., and Weymer, B. A.: Scale-dependent behavior of the foredune: Implications for barrier island response to storms and sea-level rise, *Geomorphology*, 303, 362-374, 10.1016/j.geomorph.2017.12.011, 2018b.
- 690 Huang, H., and Won, I. J.: Conductivity and susceptibility mapping using broadband electromagnetic sensors, *Journal of Environmental and Engineering Geophysics*, 5, 31-41, 2000.
- Huang, H.: Depth of investigation for small broadband electromagnetic sensors, *Geophysics*, 70, G135-G142, 10.1190/1.2122412, 2005.
- 695 Lazarus, E., Ashton, A., Murray, A. B., Tebbens, S., and Burroughs, S.: Cumulative versus transient shoreline change: Dependencies on temporal and spatial scale, *Journal of Geophysical Research*, 116, 10, 10.1029/2010jf001835, 2011.
- Lazarus, E. D., and Armstrong, S.: Self-organized pattern formation in coastal barrier washover deposits, *Geology*, 43, 363-366, 10.1130/g36329.1, 2015.
- 700 Lazarus, E. D.: Scaling laws for coastal overwash morphology, *Geophysical Research Letters*, 43, 12, 113-112, 119, 10.1002/2016gl071213, 2016.



- Lentz, E. E., and Hapke, C. J.: Geologic framework influences on the geomorphology of an anthropogenically modified barrier island: Assessment of dune/beach changes at Fire Island, New York, *Geomorphology*, 126, 82-96, 10.1016/j.geomorph.2010.10.032, 2011.
- 705 Lentz, E. E., Hapke, C. J., Stockdon, H. F., and Hehre, R. E.: Improving understanding of near-term barrier island evolution through multi-decadal assessment of morphologic change, *Marine Geology*, 337, 125-139, 10.1016/j.margeo.2013.02.004, 2013.
- McNinch, J. E.: Geologic control in the nearshore: shore-oblique sandbars and shoreline erosional hotspots, Mid-Atlantic Bight, USA, *Marine Geology*, 211, 121-141, 10.1016/j.margeo.2004.07.006, 2004.
- 710 Moore, L. J., List, J. H., Williams, S. J., and Stolper, D.: Complexities in barrier island response to sea level rise: Insights from numerical model experiments, North Carolina Outer Banks, *Journal of Geophysical Research*, 115, 10.1029/2009jf001299, 2010.
- Murray, A. S., Lazarus, E., Moore, L., Lightfoot, J., Ashton, A. D., McNamara, D. E., and Ells, K.: Decadal Scale Shoreline Change Arises from Large-Scale Interactions, While Small-Scale Changes Are Forgotten: Observational Evidence, *Proceedings of the Coastal Sediments*, San Diego, USA, 2015,
- 715 Parmentier, B., Millones, M., Griffith, D. A., Hamilton, S. E., Chun, Y., and McFall, S.: When Space Beats Time: A Proof of Concept with Hurricane Dean, 207-215, 10.1007/978-3-319-22786-3\_19, 2017.
- 720 Plant, N. G., and Stockdon, H. F.: Probabilistic prediction of barrier-island response to hurricanes, *Journal of Geophysical Research: Earth Surface*, 117, 17, 10.1029/2011jf002326, 2012.
- Riggs, S. R., Cleary, W. J., and Snyder, S. W.: Influence of inherited geologic framework on barrier shoreface morphology and dynamics, *Marine Geology*, 126, 213-234, 1995.
- 725 Sallenger, A. H.: Storm impact scale for barrier islands, *Journal of Coastal Research*, 16, 890-895, 2000.
- Schupp, C. A., McNinch, J. E., and List, J. H.: Nearshore shore-oblique bars, gravel outcrops, and their correlation to shoreline change, *Marine Geology*, 233, 63-79, 10.1016/j.margeo.2006.08.007, 2006.
- 730 Schwab, W. C., Baldwin, W. E., Hapke, C. J., Lentz, E. E., Gayes, P. T., Denny, J. F., List, J. H., and Warner, J. C.: Geologic Evidence for Onshore Sediment Transport from the Inner Continental Shelf: Fire Island, New York, *Journal of Coastal Research*, 288, 526-544, 10.2112/jcoastres-d-12-00160.1, 2013.
- 735 Simms, A. R., Lambeck, K., Purcell, A., Anderson, J. B., and Rodriguez, A. B.: Sea-level history of the Gulf of Mexico since the Last Glacial Maximum with implications for the melting history of the Laurentide Ice Sheet, *Quaternary Science Reviews*, 26, 920-940, 10.1016/j.quascirev.2007.01.001, 2007.
- Simms, A. R., Aryal, N., Miller, L., and Yokoyama, Y.: The incised valley of Baffin Bay, Texas: a tale of two climates, *Sedimentology*, 57, 642-669, 10.1111/j.1365-3091.2009.01111.x, 2010.
- 740 Sionneau, T., Bout-Roumazeilles, V., Biscaye, P. E., Van Vliet-Lanoe, B., and Bory, A.: Clay mineral distributions in and around the Mississippi River watershed and Northern Gulf of Mexico: sources and transport patterns, *Quaternary Science Reviews*, 27, 1740-1751, 10.1016/j.quascirev.2008.07.001, 2008.
- 745 Stallins, J. A., and Parker, A. J.: The Influence of Complex Systems Interactions on Barrier Island Dune Vegetation Pattern and Process, *Annals of the Association of American Geographers*, 93, 13-29, 10.1111/1467-8306.93102, 2003.

- U.S. Environmental Protection Agency: Climate change indicators in the United States, 2016, 2016.
- Weise, B. R., and White, W. A.: Padre Island National Seashore: A guide to the geology, natural environments, and history of a Texas barrier island, Texas Bureau of Economic Geology, 94, 1980.
- 750 Wernette, P., Houser, C., and Bishop, M. P.: An automated approach for extracting Barrier Island morphology from digital elevation models, *Geomorphology*, 262, 1-7, 10.1016/j.geomorph.2016.02.024, 2016.
- 755 Wernette, P. A., Houser, C., Weymer, B. A., Bishop, M. P., Everett, M. E., and Reece, R.: Influence of a spatially complex framework geology on island geomorphology, *Marine Geology*, 398, 151-162, 2018.
- Weymer, B., Everett, M. E., Houser, C., Wernette, P., and Barrineau, P.: Differentiating tidal and groundwater dynamics from barrier island framework geology: Testing the utility of portable multifrequency electromagnetic induction profilers, *Geophysics*, 81, E347-E361, 10.1190/GEO2015-0286.1, 2016.
- 760 Weymer, B., Everett, M. E., Wernette, P. A., and Houser, C.: Statistical modeling of long-range-dependent structure of barrier island framework geology and surface geomorphology, *Earth Surface Dynamics*, 6, 431-450, 10.5194/esurf-6-431-2018, 2018.
- Weymer, B. A.: A geologic characterization of the alongshore variability in beach-dune morphology: Padre Island National Seashore, Texas, Master of Science, Geology and Geophysics, Texas A&M University, 104 pp., 2012.
- 765 Weymer, B. A., Everett, M. E., de Smet, T. S., and Houser, C.: Review of electromagnetic induction for mapping barrier island framework geology, *Sedimentary Geology*, 321, 11-24, 10.1016/j.sedgeo.2015.03.005, 2015a.
- 770 Weymer, B. A., Houser, C., and Giardino, J. R.: Poststorm Evolution of Beach-Dune Morphology: Padre Island National Seashore, Texas, *Journal of Coastal Research*, 31, 634-644, 10.2112/Jcoastres-D-13-00020.1, 2015b.
- Weymer, B. A.: An investigation of the role of framework geology on modern barrier island transgression, Doctor of Philosophy, Geology and Geophysics, Texas A&M University, 2016.
- 775 Wilson, K. E., Adams, P. N., Hapke, C. J., Lentz, E. E., and Brenner, O.: Application of Bayesian Networks to hindcast barrier island morphodynamics, *Coastal Engineering*, 102, 30-43, 10.1016/j.coastaleng.2015.04.006, 2015.

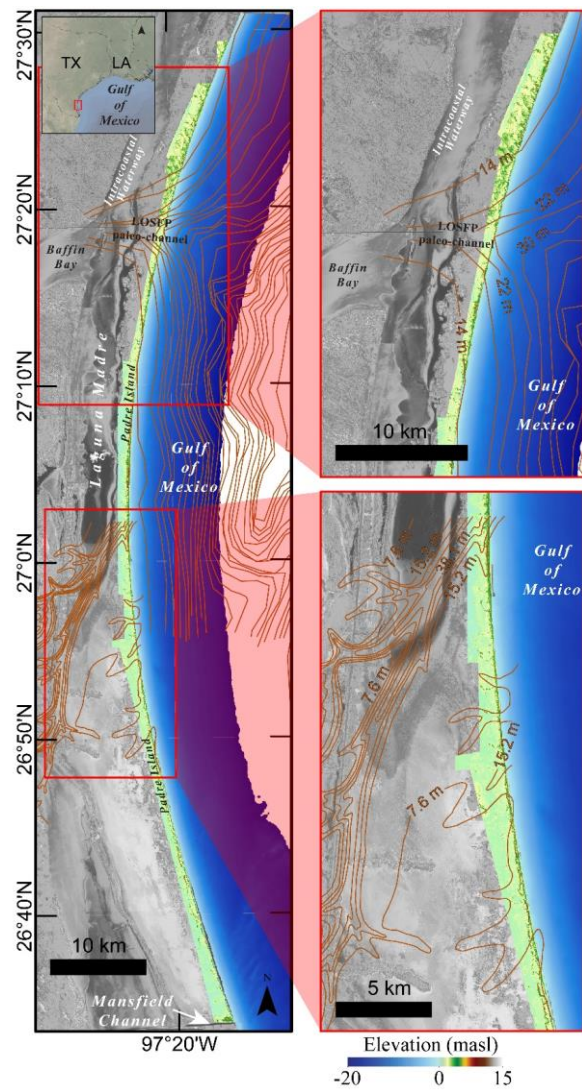

**Figure 1:** Padre Island National Seashore represents an ideal location to test topobathy DEM with Pleistocene paleo-surface contour lines from Fisk (1959) and MIS II paleo-surface contour lines from Anderson et al. (2016).

780

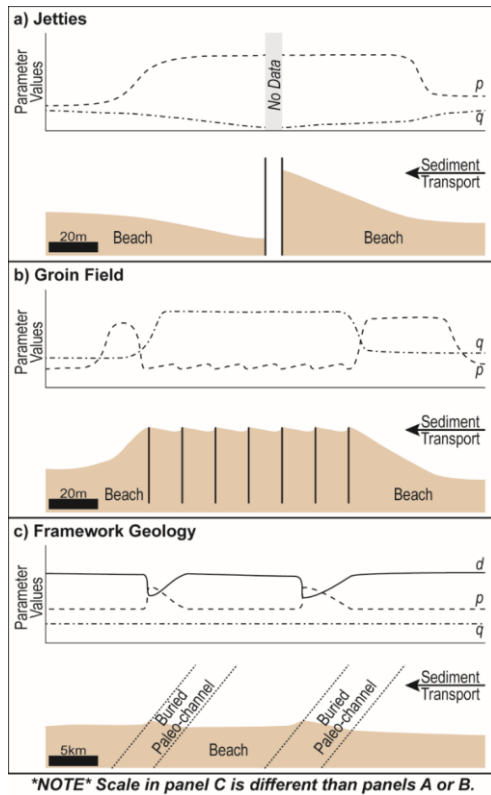

**Figure 2:** Sample beach-dune alongshore data series and ARFIMA model parameters ( $p$  = AR;  $d$  = LRD; and  $q$  = MA) for three coastal geomorphology scenarios. (a) Jetties trap sediment on the beach updrift side and starve the downdrift beach of sediment (see Ocean City, Maryland, USA), resulting in increased AR values on either side of the jetty. (b) Groin fields can trap sediment between the groins within the field, while starving the downdrift beach of sediment. In this case, beach volume at a particular location within the field can be modelled as the MA of adjacent beach volume measurements. Outside of the groin field, beach volume may increase/decrease, resulting in increased AR values and decreased MA values. (c) Framework geology, such as infilled paleochannels, influences coastal geomorphology on broader spatial scales (see “oblique gravel ridges

sandbars” in the Outer Banks, North Carolina, USA; [McNinch, 2004](#)) is much more likely to appear in the LRD values. While coastal morphology at broad-scales is influenced by the entire data series, sediment transport gradients can be influenced by more localized processes, resulting in an inverted trend with the AR component. The degree to which a particular point is influenced by the entire data series at a particular scale can be modelled and plotted using the LRD parameter.

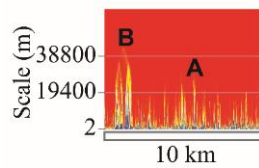

**Figure 3:** Example LRD plot using alongshore dune height at PAIS. The y-axis represents the alongshore length scale (in meters), and the x-axis represents the alongshore location. LRD is persistent at greater alongshore length scales at location B than location A. Additionally, location B is asymmetric, which may suggest a directional dependence in the data series.

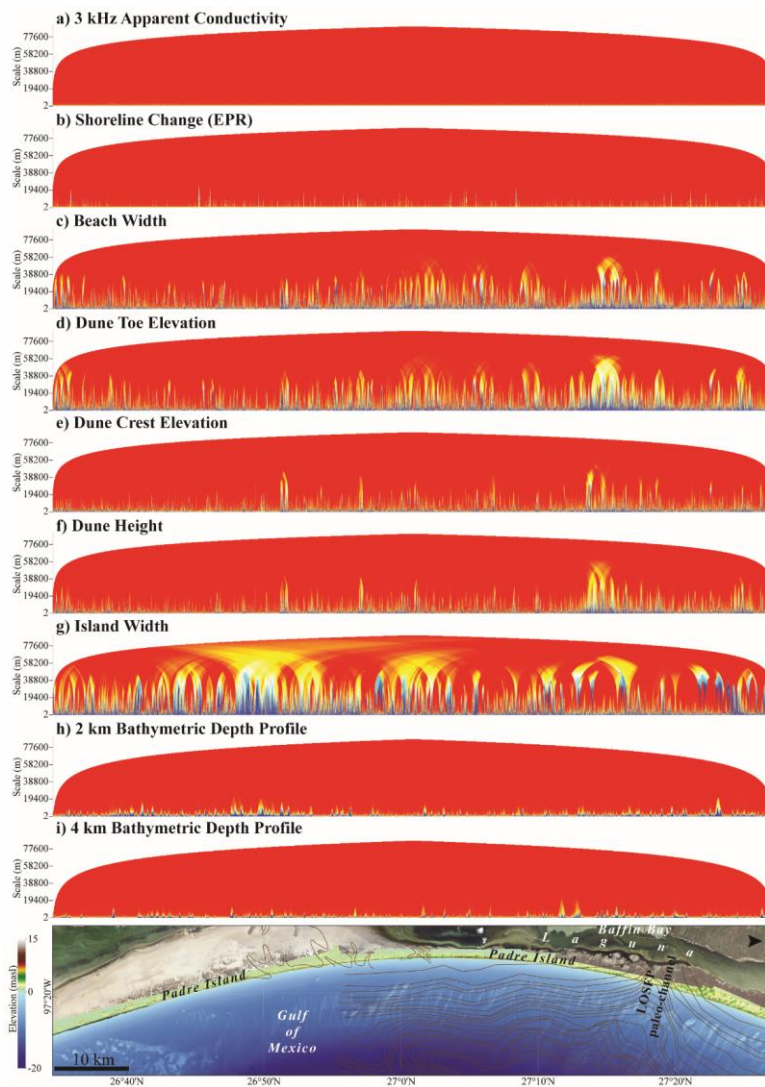

805 **Figure 4:** Long-range dependence plots of alongshore morphometrics: (a) 3 kHz apparent conductivity, (b) shoreline change rate (end-point rate), (c) beach width, (d) dune toe elevation, (e) dune crest elevation, (f) dune height, (g) island width, (h) bathymetric depth profile at 2-km offshore, and (i) bathymetric depth profile at 4-km offshore. All LRD plots are aligned with the

map below, based on latitude. Previously documented variability in the framework geology is indicated by the contour lines representing the Pleistocene (*i.e.* MIS II) paleo-surface (Anderson et al., 2016; Fisk, 1959).

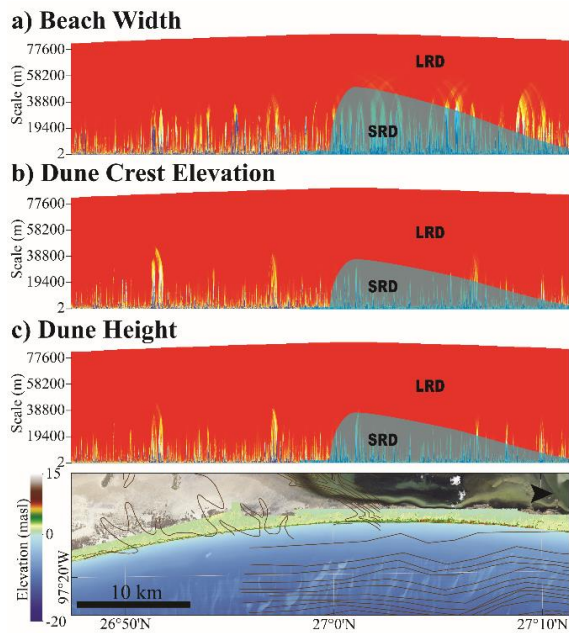

**Figure 5:** LRD plots of (a) beach width, (b) dune crest elevation, and (c) dune height for central PAIS, where Fisk (1959) identified a series of relict infilled paleo-channels dissecting the island. The scale at which LRD breaks down in favor of SRD is greatest at the southern edge of large paleo-channels, and this scale gradually decreases to the north. Smaller paleo-channels do not appear to be as influential to the modern beach and dune morphology, suggesting that small channels may not have as significant an influence as larger channels.

820

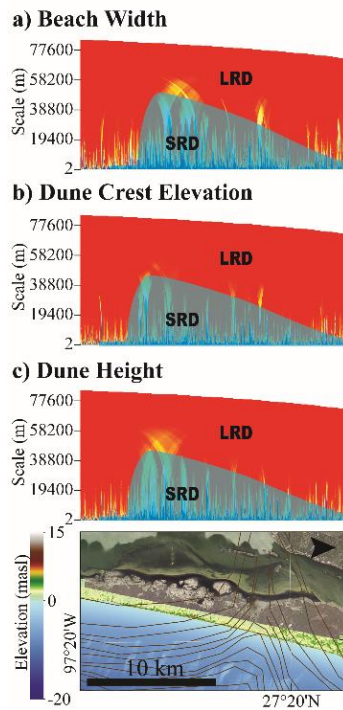

**Figure 6:** LRD plots of (a) beach width, (b) dune crest elevation, and (c) dune height for PAIS adjacent to the ancestral LOSP Creeks, forming the modern Baffin Bay. LRD breaks down in favor of SRD at the largest scales at the southern edge of the previously identified paleo-channel. The scale at which LRD breaks down to SRD decreases gradually to the north of the channel, suggesting that the paleo-channel asymmetrically influenced beach and dune morphology.



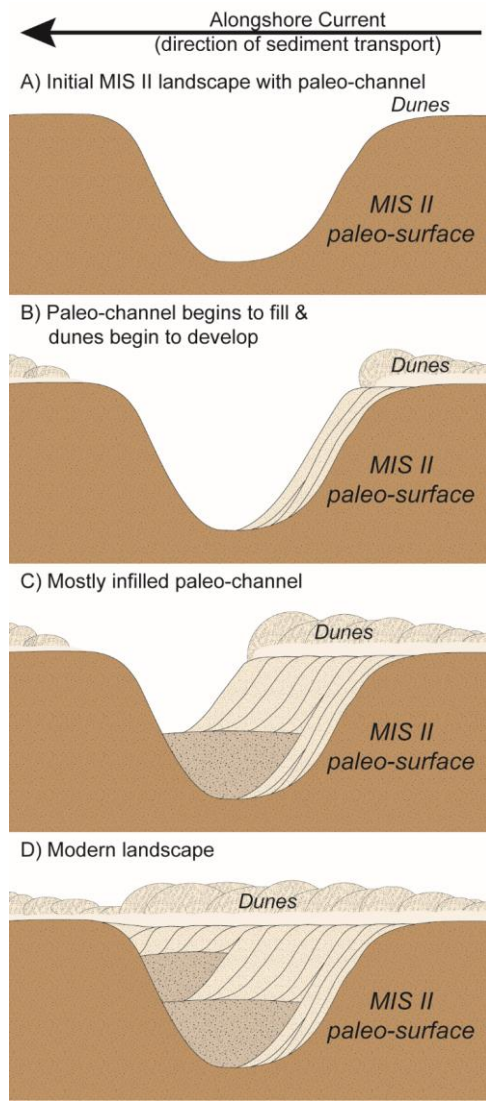

**Figure 7:** The stages of how paleo-channels in the framework geology affected barrier island development and evolution at PAIS, beginning with (A) initial paleo-channel incision (approximately MIS II). (B) As sea-level began to rise, sediment was transported south from river

830

835 outlets to the north and was deposited along the northern edge of the paleo-channel. (C) Continued sea-level rise and sedimentation from the north, coupled with episodic fluvial channel fill, continue to fill the paleo-channel until (D) the paleo-channel is completely infilled and the island coalesces alongshore. From A to D beaches to the north of the active channel area are supplied with sediment from river outlets updrift, which provide ample sediment supply for aeolian sediment transport and dune development.
